# Supplementary material for: Drug-Related Problems and Recommendations Made during Home Medicines Reviews for Sick Day Medication Management in Australia
Source: MDPI journal article supplement (doi:10.3390/medicina60050798), 2024-05-11
Supplement: s1 [file s1]

Table S1: Modified DOCUMENT DRP and examples from HMR.

| <b>Code</b> | <b>Drug related problem</b> | <b>Description</b>                                                                                             | <b>Example from HMR</b>                                                                                                                                                                                                         |
|-------------|-----------------------------|----------------------------------------------------------------------------------------------------------------|---------------------------------------------------------------------------------------------------------------------------------------------------------------------------------------------------------------------------------|
| D1          | Duplication                 | Inappropriate use of two drugs from the same therapeutic class                                                 | “...given there is a duplication of vitamin D in the Caltrate supplement...”                                                                                                                                                    |
| D2          | Drug interaction            | Likely interaction between two prescribed drugs (no symptoms evident yet)                                      | “Mr X is prescribed clomipramine, olanzapine and thioridazine and all of these can cause QT interval prolongation.”                                                                                                             |
| D3          | Wrong Drug                  | Incorrect drug supplied, either by an incorrect doctor’s prescription or incorrectly dispensed by the pharmacy | “Mrs X is administered carvedilol for the management of heart failure...carvedilol is a non-selective betablocker and can be associated with increased risk of bronchospasm noting that Mrs X does have a history of asthma...” |
| D4          | Incorrect strength          | Incorrect or no details about strength of medication supplied                                                  | N/A                                                                                                                                                                                                                             |
| D5          | Inappropriate dosage form   | Formulation is inappropriate in terms of the intended use of the product                                       | N/A                                                                                                                                                                                                                             |
| D6          | Contraindications apparent  | Patient has a contraindication or precaution to the drug being used due to their medical conditions, or a      | “She also has a history of glaucoma and recent ophthalmological visit highlighted increased                                                                                                                                     |

|    |                              |                                                                                                                                             |                                                                                                                                                                 |
|----|------------------------------|---------------------------------------------------------------------------------------------------------------------------------------------|-----------------------------------------------------------------------------------------------------------------------------------------------------------------|
|    |                              | previous allergy to the drug or drug group                                                                                                  | intraocular pressure.<br>Ongoing use of amitriptyline could further worsen glaucoma...”                                                                         |
| D7 | No indication apparent       | No clear indication for the use of the drug                                                                                                 | “She is taking the anticoagulant apixaban...although I could not determine an indication from the list of current conditions.”                                  |
| D0 | Other drug selection problem | Other drug selection issues, such as the patient is taking expired medication or a more effective drug than the one prescribed is available | “Nulax is a bulk-forming laxative and requires adequate hydration to be effective and given that Mr X is on the fluid restriction...they may not be effective.” |
| O1 | Prescribed dose too high     | Total daily dose exceeds guidelines, either due to reference dose ranges or patient parameters (age, renal function, etc.)                  | “If used for anticoagulation in the setting of AF, a lower dose of rivaroxaban at 15mg daily is recommended...”                                                 |
| O2 | Prescribed dose too low      | Total daily dose is not adequate for treatment                                                                                              | “She is only taking 480mg dose twice daily and her weight of around 58-59kg allows for dosing up to 1g per dose.”                                               |

|    |                                                     |                                                                                                             |                                                                                                                  |
|----|-----------------------------------------------------|-------------------------------------------------------------------------------------------------------------|------------------------------------------------------------------------------------------------------------------|
| O3 | Incorrect/unclear dosing instructions               | Specified dosing frequency/schedule or duration of treatment is unclear or incorrect                        | “It is an ocular steroid...it should be used under close supervision and PRN administration may not be optimal.” |
| O0 | Other dose problem                                  | Other dose related problem, such as incorrect frequency or schedule                                         | “Sometimes administration of atorvastatin can cause sleep disturbances...”                                       |
| C1 | Taking too little                                   | Patient using too little of the medication due to forgetfulness or poor understanding of therapy            | “Mrs X advised that she has been taking Symbicort Turbuhaler one daily. Currently it is prescribed as 1 bd.”     |
| C2 | Taking too much                                     | Patient using too much of the medication due to forgetfulness or poor understanding of therapy              | N/A                                                                                                              |
| C3 | Erratic use of medication                           | Patient using medication on an erratic basis                                                                | “Mrs X has not been taking her Symbicort Turbuhaler, instead saying she only uses when necessary...”             |
| C4 | Intentional drug misuse (including OTC medications) | Suspected overuse of a drug that is potentially abused                                                      | N/A                                                                                                              |
| C5 | Difficulty using dosage form                        | Patient has a physical problem using the dosage form due to swallowing difficulties, manual dexterity, etc. | “Mrs X reported some difficulty swallowing large tablet size including fish oil as well as Panadol Osteo.”       |

|    |                               |                                                                                                                                           |                                                                                                                                                                  |
|----|-------------------------------|-------------------------------------------------------------------------------------------------------------------------------------------|------------------------------------------------------------------------------------------------------------------------------------------------------------------|
| C0 | Other compliance problem      | Other compliance issues, such as patient choosing not to take the medication due to the product information or a media release, etc.      | “There have been recent reports of difficulty getting warfarin packs due to communication issues between his current medical centre, pharmacy and group home...” |
| U1 | Condition undertreated        | Patient has a symptom or condition that is not currently being treated adequately                                                         | “He is administered mirtazapine 7.5mg nocte...reported his mood has been a bit low recently due to the recent death of his dog as well as being stressed...”     |
| U2 | Condition untreated           | Patient has a symptom or condition that is not being treated                                                                              | “Health summary documented his diagnosis of osteoporosis, but therapy was not listed, and I could not confirm if treatment is currently being given.”            |
| U3 | Preventative therapy required | Patient requires additional therapy to prevent an adverse event occurring (due to patient’s therapy, coexisting diseases or risk factors) | “The use of leuporelin can be associated with low bone mineral density which increases the risk of osteoporosis...There could be benefit from the addition of a  |

|    |                                             |                                                                                                            |                                                                                                                               |
|----|---------------------------------------------|------------------------------------------------------------------------------------------------------------|-------------------------------------------------------------------------------------------------------------------------------|
|    |                                             |                                                                                                            | vitamin D and calcium supplement which may reduce the loss of bone mineral density.”                                          |
| U0 | Other untreated problem                     | Other untreated indication problem                                                                         | N/A                                                                                                                           |
| M1 | Laboratory monitoring                       | Patient requires a laboratory test, such as serum electrolyte or drug levels (no symptoms evident yet)     | “It would be prudent for ongoing monitoring and review of thyroid function to ensure Mrs X remains in a euthyroid state”      |
| M2 | Non laboratory monitoring                   | Patient requires a non-laboratory test, such as BP, BSL or weight check (no symptoms evident yet)          | “It would be prudent to monitor for any signs of postural drop for e.g. monitoring both sitting and standing blood pressure.” |
| M0 | Other monitoring problem                    | Other monitoring problem, such as patient unable to afford monitoring                                      | “Given that metformin usually does not cause hypoglycaemia, suggest withdrawal of BGL monitoring...”                          |
| E1 | Patient requests drug information           | Patient requests information about their medication                                                        | “Mrs also asked me about taking calcium tablets.”                                                                             |
| E2 | Patients requests disease management advice | Patient requests information about the management or prevention of a condition                             | N/A                                                                                                                           |
| E3 | Confusion about therapy or condition        | Patient has a poor understanding of their medical condition, but their medication compliance appears to be | “She may receive greater benefit from using her Symbicort                                                                     |

|    |                                                                           |                                                                                                                                   |                                                                                                                                                                         |
|----|---------------------------------------------------------------------------|-----------------------------------------------------------------------------------------------------------------------------------|-------------------------------------------------------------------------------------------------------------------------------------------------------------------------|
|    |                                                                           | adequate according to the dispensing history                                                                                      | regularly...however I am not sure she was convinced”                                                                                                                    |
| E4 | Demonstration of device                                                   | Patient has a technical problem with the administration of a device                                                               | N/A                                                                                                                                                                     |
| E0 | Other education or information problem                                    | Other education problem, such as another health professional requests information                                                 | N/A                                                                                                                                                                     |
| N0 | Clinical interventions that cannot be classified under any other category | Clinical interventions that the pharmacist feels does not belong elsewhere (must still be a clinical problem, not administrative) | “Mrs X did say that she was charted on mirtazapine ‘to improve her appetite’...not clear if Mrs X is also seen by a dietician.”                                         |
| T1 | Toxicity caused by dose                                                   | Patient has signs or symptoms of an adverse reaction that is likely to be dose-related                                            | “She complained of daytime tiredness/drowsiness...I note pramipexole could contribute to feeling fatigue.”                                                              |
| T2 | Toxicity caused by drug interaction                                       | Patient has signs or symptoms of an adverse reaction that is likely to be related to the presence of an interacting drug          | “There have been recent reports of vertigo... the combination of three agents in conjunction with his use of furosemide can increase the risk of postural hypotension.” |
| T3 | Toxicity evident                                                          | Patient experiencing symptoms of toxicity where there is a suspected medication cause                                             | “Mr X reported that he experienced symptoms of itchy skin...he is                                                                                                       |

|       |                             |                                                                                                                                                                                                   |                                                                                                                                                                 |
|-------|-----------------------------|---------------------------------------------------------------------------------------------------------------------------------------------------------------------------------------------------|-----------------------------------------------------------------------------------------------------------------------------------------------------------------|
|       |                             |                                                                                                                                                                                                   | administered rivaroxaban which can be associated with pruritis...”                                                                                              |
| T4 ** | Cautioning against toxicity | Patient at risk of toxicity/adverse drug reaction but <u>no symptoms yet</u> . Pharmacists may warn of side effects/cautions to take when using the medication e.g. risk of falls, sedation, etc. | “Prednisolone may reduce bone mineral density and Mrs X has a history of falls.”                                                                                |
| T0    | Other toxicity evident      | Other toxicity suspected of being related to a drug                                                                                                                                               | “I am not clear if her muscle discomfort is secondary due to statin therapy.”                                                                                   |
| NC ** | Not clinical (NC)           | Non clinical issues, often documentation/administrative discrepancies.                                                                                                                            | “Mrs X is allergic to Zocor, however, she has been receiving simvastatin 40mg at night time and as indicated as above she has been tolerating this medication.” |

\*\*New categories added to existing DOCUMENT system

Table S2: Modified DOCUMENT recommendations and examples from HMR.

| <b>Code</b> | <b>Recommendation</b>           | <b>Description</b>                                                                                 | <b>Example from HMR</b>                                                                                                          |
|-------------|---------------------------------|----------------------------------------------------------------------------------------------------|----------------------------------------------------------------------------------------------------------------------------------|
| R1          | Dose decrease                   | Pharmacist recommends the daily dose of medication is decreased                                    | “...a gradual dose reduction of diazepam at night time could be considered.”                                                     |
| R2          | Dose increase                   | Pharmacist recommends the daily dose of medication is increased                                    | “...perhaps addition of a lunchtime dose of quetiapine may be of benefit.”                                                       |
| R3          | Drug change                     | Pharmacist recommends a change in current medications, such as initiating or ceasing a medication  | N/A                                                                                                                              |
| R3a **      | Drug change: cease              | Pharmacist specifies ceasing a medication                                                          | “...consider withdrawal of iron supplement if possible.”                                                                         |
| R3b **      | Drug change: initiate           | Pharmacist specifies initiating a medication                                                       | “Would he benefit from addition of vitamin D supplement for his osteoporosis?”                                                   |
| R3c **      | Drug change: cease and initiate | Pharmacist specifies ceasing a medication and initiating another                                   | “Suggest replacing Agarol with Movicol or lactulose”                                                                             |
| R4          | Drug formulation change         | Pharmacist recommends a change in formulation that does not alter the drug or its total daily dose | “Omeprazole should not be crushed. Suggest replacing it with lansoprazole 15-30mg daily which can easily be dissolved in water.” |
| R5          | Drug brand change               | Pharmacist recommends a change in the brand to                                                     | N/A                                                                                                                              |



|        |                                                                     |                                                                                                                                                    |                                                                                                                                      |
|--------|---------------------------------------------------------------------|----------------------------------------------------------------------------------------------------------------------------------------------------|--------------------------------------------------------------------------------------------------------------------------------------|
|        |                                                                     | improve compliance or due to stock unavailability, etc                                                                                             |                                                                                                                                      |
| R6     | Dose frequency/schedule change                                      | Pharmacist suggests a change in the number of times per day or timing of the doses, without changing the total daily dose                          | “Suggest switching to mane dosing if ongoing poor sleep is a concern.”                                                               |
| R7     | Prescription not dispensed                                          | Pharmacist does not dispense the prescription due to the circumstances, such as when the patient needs to visit the prescriber prior to dispensing | N/A                                                                                                                                  |
| R8     | Other changes to therapy                                            | Pharmacist recommends another change to patient’s current therapy                                                                                  | “Acnatac is likely to increase susceptibility to UV radiation, and so increased sun protection is recommended.”                      |
| R8a ** | Drug change: combination formulation                                | Pharmacist recommends to changing an individual drug formulation to a combined drug formulation.                                                   | “To reduce pill burden suggest using a combination product of calcium and vitamin D...”                                              |
| R9     | Refer to prescriber; prescriber to continue monitoring, review, etc | Pharmacist refers patient to their prescriber to resolve the DRP                                                                                   | “Given the history of smoking you may wish to consider monitoring for any underlying signs of COPD given the recent cough symptoms.” |
| R9a ** | Review prescribed medicine                                          | Pharmacist recommends to specifically review the current prescribed medications                                                                    | “In view of her weight gain reviewing the need for this supplement would be suggested.”                                              |

|     |                                  |                                                                                                                                                                                                                                                 |                                                                                                                                                                       |
|-----|----------------------------------|-------------------------------------------------------------------------------------------------------------------------------------------------------------------------------------------------------------------------------------------------|-----------------------------------------------------------------------------------------------------------------------------------------------------------------------|
| R10 | Refer to hospital                | Pharmacist refers patient to the hospital to resolve the DRP                                                                                                                                                                                    | N/A                                                                                                                                                                   |
| R11 | Refer for medication review      | Pharmacist recommends patient have a medication review to resolve the DRP (known as a Home Medications Review or HMR in Australia where a pharmacist visits the patient at home and sends a clinical review letter to their treating physician) | N/A                                                                                                                                                                   |
| R12 | Other referral required          | Pharmacist refers patient to another health professional to resolve the DRP, such as a dentist, podiatrist, diabetes educator, etc                                                                                                              | “Consider a referral to physiotherapy or exercise physiologist for a tailored exercise regime.”                                                                       |
| R13 | Education/counselling session    | Pharmacist provides a detailed counselling or education session to the patient to resolve the DRP                                                                                                                                               | “We discussed her medications, what each one is used for.”                                                                                                            |
| R14 | Written summary of medications   | Pharmacist provides patient with a detailed list of their medications to resolve the DRP                                                                                                                                                        | N/A                                                                                                                                                                   |
| R15 | Commence dose administration aid | Pharmacist suggests that the patient start using a dose administration aid (such as a Webster pack or dosette box)                                                                                                                              | “It would be prudent to consider packing all of his medications for ease of administration and to reduce the risk of an inadvertent medication administration error.” |

|         |                                  |                                                                                                                   |                                                                                                                                                             |
|---------|----------------------------------|-------------------------------------------------------------------------------------------------------------------|-------------------------------------------------------------------------------------------------------------------------------------------------------------|
| R16     | Other written information        | Pharmacist provides other written information, such as Self Care cards                                            | N/A                                                                                                                                                         |
| R16a ** | Information to nursing staff     | Pharmacist provides information to nursing staff to resolve DRP                                                   | “It would be prudent to ensure that staff are rinsing Mrs X’s mouth after each use to reduce the risk of voice changes as well as oral thrush.”             |
| R17     | Monitoring: laboratory test      | Pharmacist suggests that the prescriber undertake some laboratory monitoring to monitor for DRP                   | “Given the use of carbamazepine consideration could also be given for assessment of LFT’s noting the recent elevated GGT levels.”                           |
| R18     | Monitoring: non-laboratory test  | Pharmacist suggests that the patient or prescriber undertake some non-laboratory monitoring to monitor for DRP    | “...consider monitoring both sitting and standing blood pressures to help observe signs of a postural drop.”                                                |
| R19     | No recommendation necessary      | Pharmacist has investigated the problem and finds that the problem does not need to be addressed with any changes | N/A                                                                                                                                                         |
| R20 **  | Nonclinical e.g. update document | Pharmacists makes a non-clinical recommendation to resolve issue.                                                 | “Consider discarding stock and to follow-up with pharmacy to ensure that new signing sheets do not continue to be sent due to risk of medication incident.” |

|       |                  |                                                                      |                                           |
|-------|------------------|----------------------------------------------------------------------|-------------------------------------------|
| R0 ** | Not classifiable | Pharmacist recommendation cannot be classified by any other category | “Is Ms X being treated for osteoporosis?” |
|-------|------------------|----------------------------------------------------------------------|-------------------------------------------|

\*\*New categories added to existing DOCUMENT system
